# Supplementary material for: Screens in fly and beetle reveal vastly divergent gene sets required for developmental processes
Source: PubMed Central journal article supplement (PMC8827203; doi:10.1186/s12915-022-01231-4), 2022-02-08

**Figure S1: Genes known from *Drosophila* tested in the iBeetle screen**

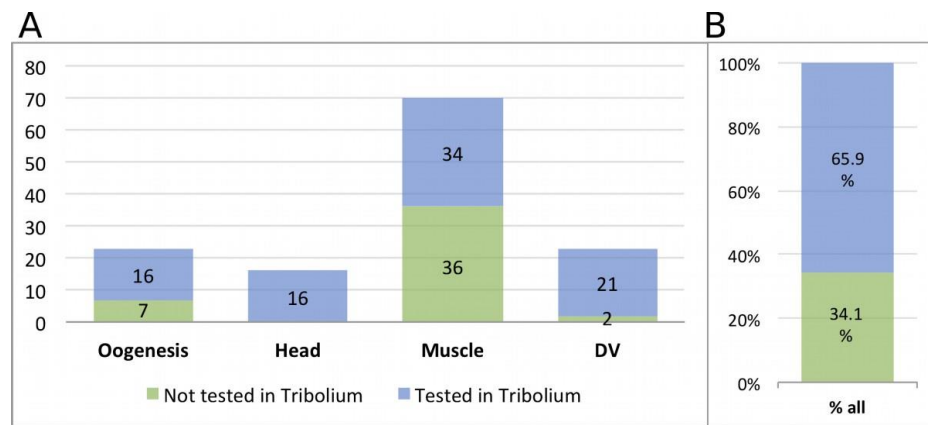

**Figure S2: Phylogenetic\_Tree\_TC001720**

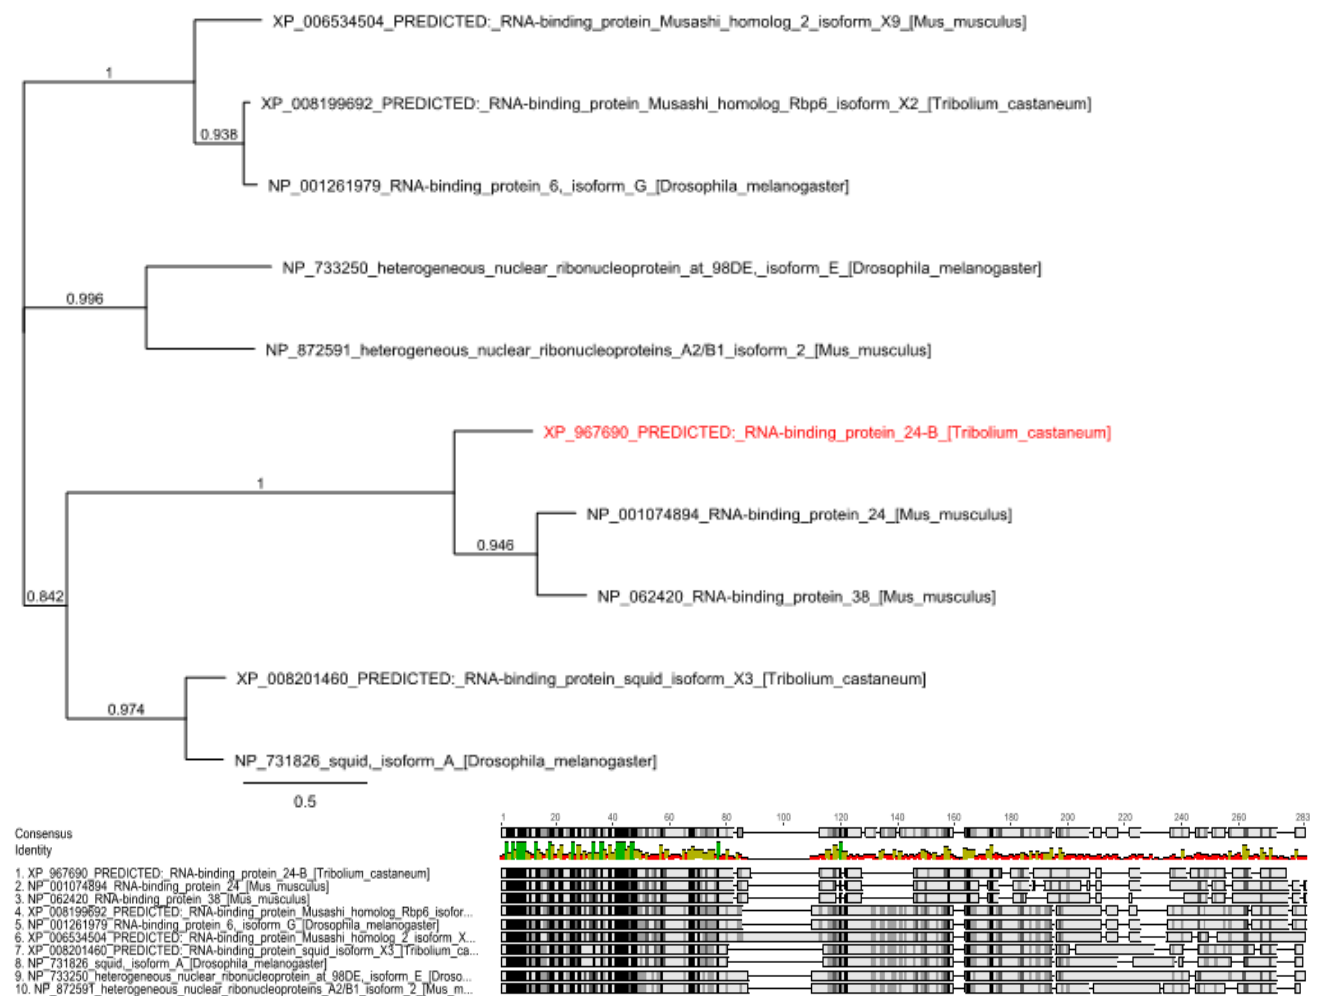

**Figure S3: Phylogenetic\_Tree\_TC002909**

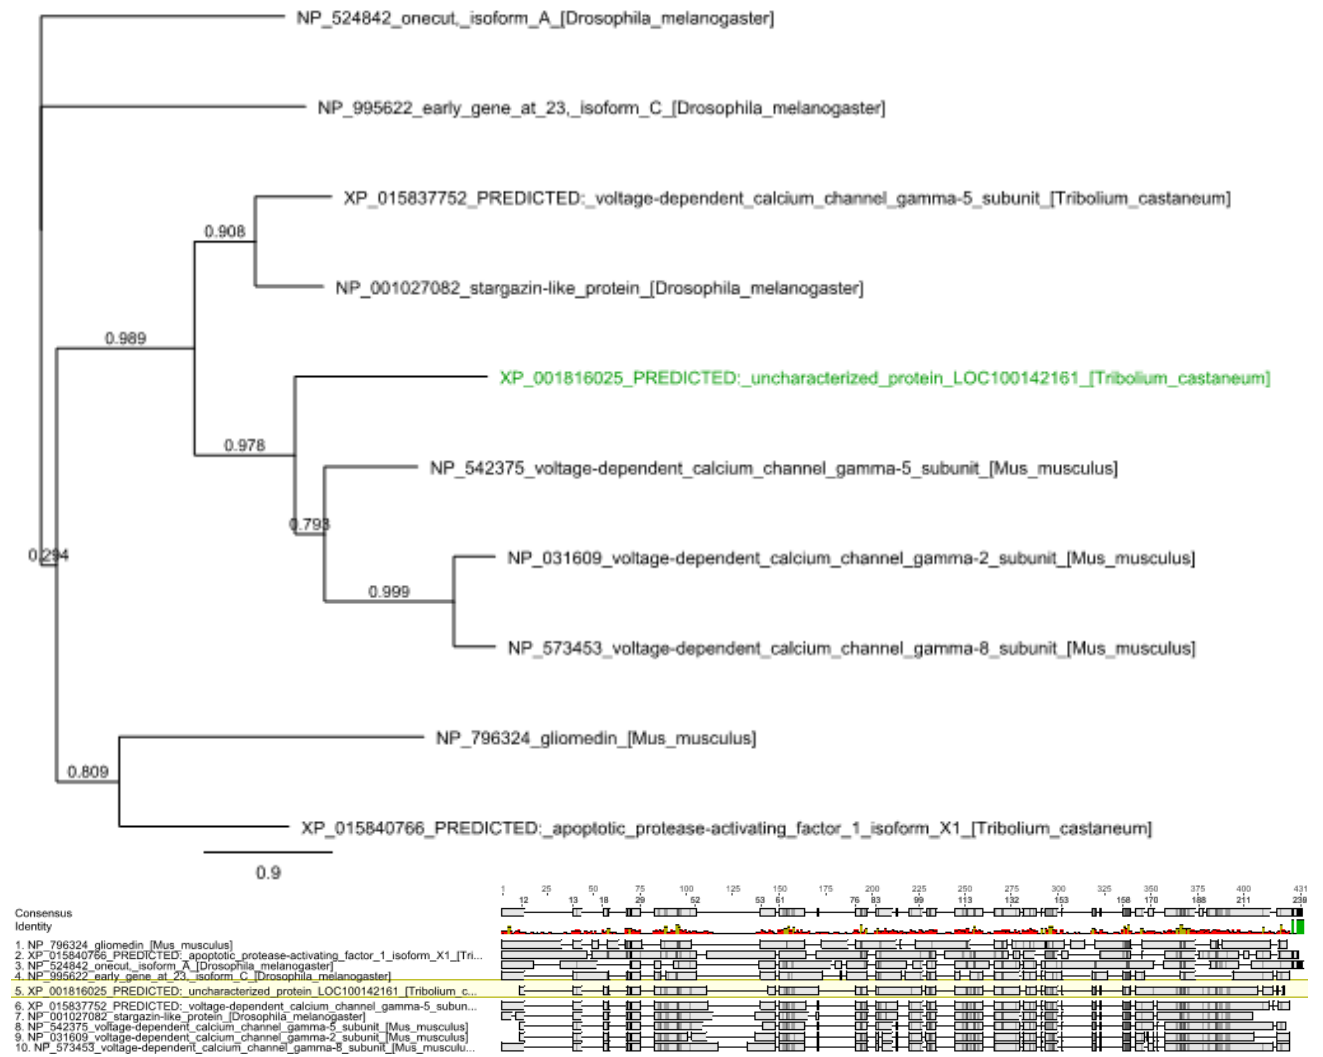

Supplement: 12915_2022_1231_MOESM2_ESM.pdf [file 12915_2022_1231_MOESM2_ESM.pdf]
